# Supplementary material for: Landscape of transcriptional deregulation in lung cancer
Source: PubMed Central journal article supplement (PMC5987572; doi:10.1186/s12864-018-4828-1), 2018-06-05

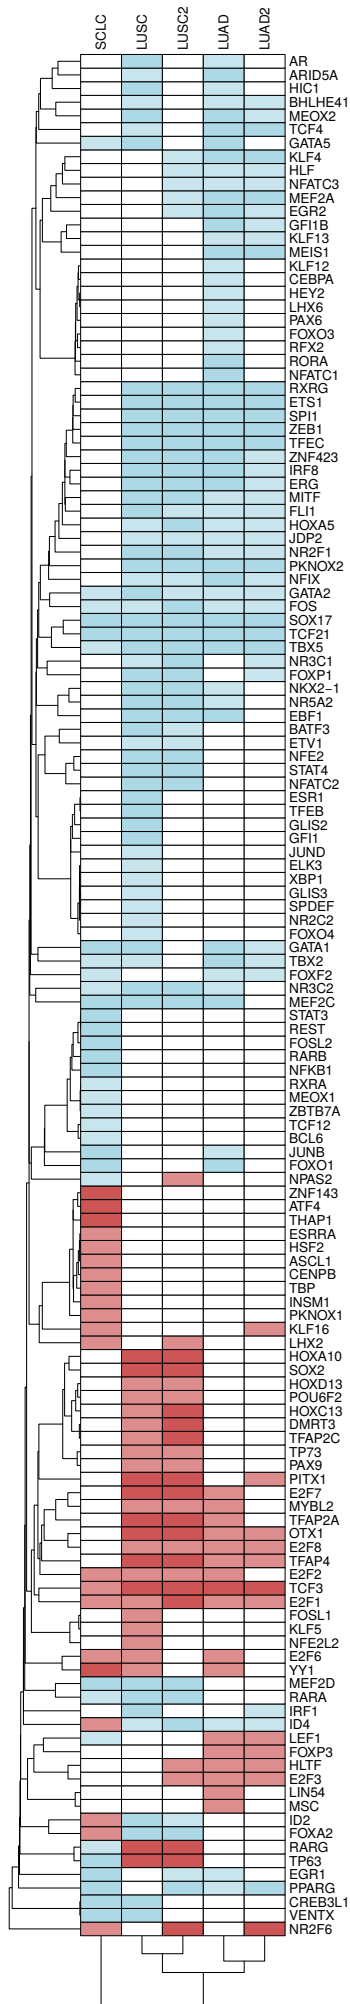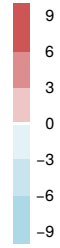

Supplement: 12864_2018_4828_MOESM5_ESM.pdf [file 12864_2018_4828_MOESM5_ESM.pdf]
